# Supplementary material
Source: MDPI journal article supplement (https://www.mdpi.com/1424-8247/14/4/372)

## Supplementary Information

### Screening of benzimidazole-based anthelmintics and their enantiomers as repurposed drug candidates in cancer therapy

Rosalba Florio<sup>1</sup>, Simone Carradori<sup>1,\*</sup>, Serena Veschi<sup>1</sup>, Davide Brocco<sup>1</sup>, Teresa Di Genni<sup>1</sup>, Roberto Cirilli<sup>2</sup>, Adriano Casulli<sup>3,4</sup>, Alessandro Cama<sup>1,5,\*</sup>, Laura De Lellis<sup>1</sup>

<sup>1</sup>Department of Pharmacy, G. d'Annunzio University of Chieti-Pescara, 66100 Chieti, Italy

<sup>2</sup>Centro nazionale per il controllo e la valutazione dei farmaci, Istituto Superiore di Sanità, 00161 Rome, Italy

<sup>3</sup>WHO Collaborating Centre for the Epidemiology, Detection and Control of Cystic and Alveolar Echinococcosis (in Animals and Humans), Istituto Superiore di Sanità (ISS), 00161 Rome, Italy

<sup>4</sup>European Union Reference Laboratory for Parasites, Istituto Superiore di Sanità (ISS), 00161 Rome, Italy

<sup>5</sup>Center for Advanced Studies and Technology (CAST), University "G. d'Annunzio" of Chieti-Pescara, 66100 Chieti, Italy

\*Corresponding authors: Simone Carradori PhD, [simone.carradori@unich.it](mailto:simone.carradori@unich.it); Alessandro Cama, MD, [alessandro.cama@unich.it](mailto:alessandro.cama@unich.it)

**Table S1.** IC<sub>50</sub> values of the six less active benzimidazoles on pancreatic (AsPC-1, BxPC-3), paraganglioma (PTJ64i, PTJ86i), and colorectal (HT-29, SW480) cancer cell lines. These IC<sub>50</sub> values were calculated by Graphpad PRISM software after a 72-hour treatment with benzimidazoles at concentrations ranging from 0  $\mu$ M to 20  $\mu$ M and resulted all higher than 20  $\mu$ M, which was the highest concentration used in MTT assays.

|                                | IC <sub>50</sub> ( $\mu$ M) |        |        |        |       |       |
|--------------------------------|-----------------------------|--------|--------|--------|-------|-------|
|                                | AsPC-1                      | BxPC-3 | PTJ64i | PTJ86i | HT-29 | SW480 |
| <b>Thiabendazole</b>           | >20                         | >20    | >20    | >20    | >20   | >20   |
| <b>Triclabendazole</b>         | >20                         | >20    | >20    | >20    | >20   | >20   |
| <b>Triclabendazole sulfone</b> | >20                         | >20    | >20    | >20    | >20   | >20   |
| <b>Albendazole sulfone</b>     | >20                         | >20    | >20    | >20    | >20   | >20   |
| <b>Fenbendazole sulfone</b>    | >20                         | >20    | >20    | >20    | >20   | >20   |



**Table S3.** *In silico* estimated physicochemical parameters of compounds albendazole sulfone (**ALB.SO<sub>2</sub>**), fenbendazole sulfone (**FEN.SO<sub>2</sub>**), thiabendazole (**THI**), triclabendazole (**TRI**), triclabendazole sulfone (**TRI.SO<sub>2</sub>**), ricobendazole (**RBZ**), and oxfendazole (**OXF**), used to device the boiled-egg graph (Figure S1) and bioavailability radar (Figure S2).

| Cmpd                      | WLOGP <sup>a</sup> | TPSA (Å <sup>2</sup> ) <sup>a,b</sup> | XLOGP3 <sup>b</sup> | Log S (ESOL) <sup>b</sup> | MW <sup>b</sup> | Csp3 <sup>b</sup> | N° of rotatable bonds <sup>b</sup> |
|---------------------------|--------------------|---------------------------------------|---------------------|---------------------------|-----------------|-------------------|------------------------------------|
| <b>ALB.SO<sub>2</sub></b> | 2.81               | 109.53                                | 1.53                | -2.58                     | 297.33          | 0.33              | 6                                  |
| <b>FEN.SO<sub>2</sub></b> | 3.46               | 109.53                                | 2.20                | -3.43                     | 331.35          | 0.07              | 5                                  |
| <b>THI</b>                | 2.69               | 69.81                                 | 2.22                | -3.16                     | 201.25          | 0                 | 1                                  |
| <b>TRI</b>                | 6.04               | 63.21                                 | 5.74                | -6.02                     | 359.66          | 0.07              | 3                                  |
| <b>TRI.SO<sub>2</sub></b> | 5.80               | 80.43                                 | 4.47                | -5.37                     | 391.66          | 0.07              | 3                                  |
| <b>RBZ</b>                | 2.93               | 103.29                                | 1.45                | -2.45                     | 281.33          | 0.33              | 6                                  |
| <b>OXF</b>                | 3.58               | 103.29                                | 2.18                | -3.34                     | 315.35          | 0.07              | 5                                  |

<sup>a</sup>Parameters used for the boiled-egg graph. <sup>b</sup>Parameters used for the bioavailability radar. Bioavailability radar parameters functional ranges: XLOGP3 between -0.7 and +5.0, MW between 150 and 500 g/mol, TPSA between 20 and 130 Å<sup>2</sup>, log S not higher than 6, saturation: fraction of carbons in the sp<sup>3</sup> hybridization not less than 0.25, and flexibility: no more than 9 rotatable bonds.

**Table S4.** Results obtained by protein target prediction for (1) albendazole, (2) ricobendazole, (3) albendazole sulfone, (4) oxfendazole, (5) fenbendazole sulfone, (6) triclabendazole, (7) triclabendazole sulfone, (8) thiabendazole, (9) flubendazole, (10) oxibendazole, and (11) parbendazole.

## 1. Albendazole

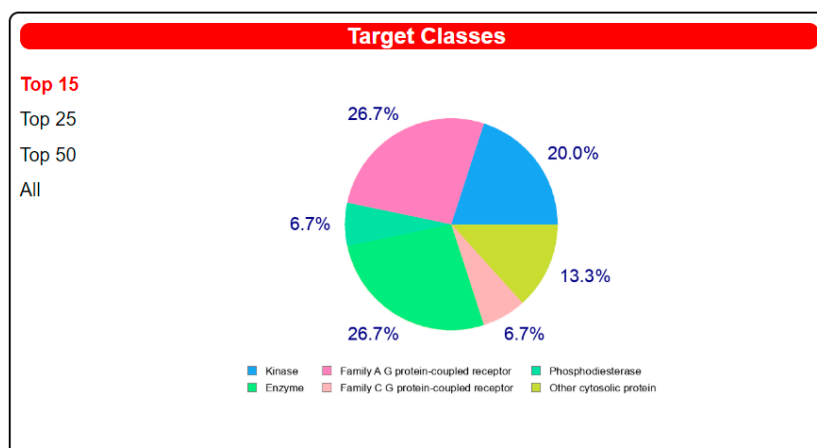

| Target                                   | Common name | Target Class                        | Probability |
|------------------------------------------|-------------|-------------------------------------|-------------|
| MAP kinase p38 alpha                     | MAPK14      | Kinase                              | 0.14433     |
| Adenosine A2a receptor                   | ADORA2A     | Family A G protein-coupled receptor | 0.06262     |
| Serine/threonine-protein kinase Aurora-A | AURKA       | Kinase                              | 0.05356     |
| Adrenergic receptor beta                 | ADRB2       | Family A G protein-coupled receptor | 0.05356     |
| Beta-1 adrenergic receptor               | ADRB1       | Family A G protein-coupled receptor | 0.05356     |

## 2. Ricobendazole

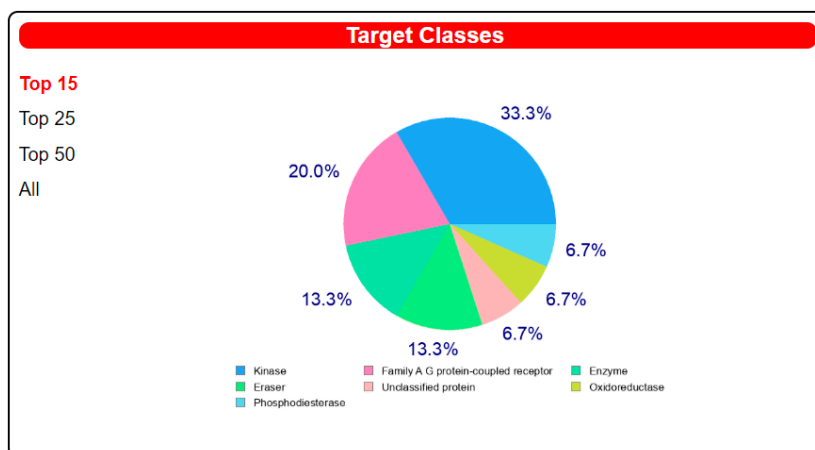

| Target                         | Common name | Target Class                        | Probability |
|--------------------------------|-------------|-------------------------------------|-------------|
| MAP kinase p38 alpha           | MAPK14      | Kinase                              | 0.12775     |
| Adenosine A2a receptor         | ADORA2A     | Family A G protein-coupled receptor | 0.12775     |
| Poly [ADP-ribose] polymerase-1 | PARP1       | Enzyme                              | 0.11204     |
| Histone deacetylase 6          | HDAC6       | Eraser                              | 0.11204     |
| Histone deacetylase 1          | HDAC1       | Eraser                              | 0.11204     |

### 3. Albendazole sulfone

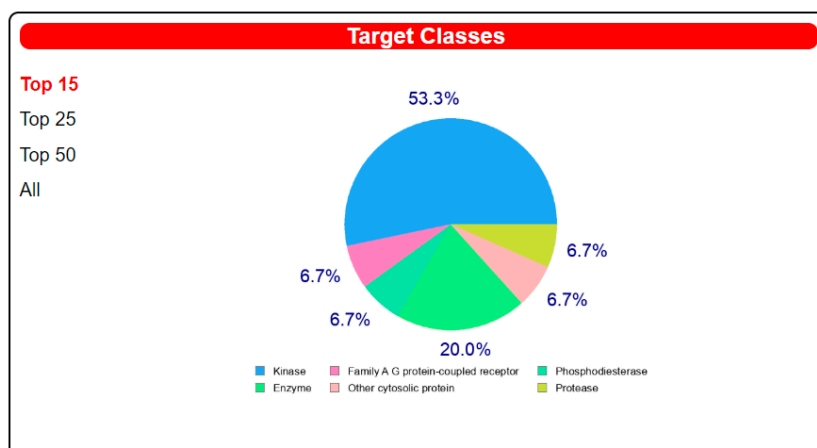

| Target                                     | Common name | Target Class                        | Probability |
|--------------------------------------------|-------------|-------------------------------------|-------------|
| MAP kinase p38 alpha                       | MAPK14      | Kinase                              | 0.10058     |
| Adenosine A2a receptor                     | ADORA2A     | Family A G protein-coupled receptor | 0.10058     |
| Tyrosine-protein kinase SRC                | SRC         | Kinase                              | 0.10058     |
| Phosphodiesterase 4A                       | PDE4A       | Phosphodiesterase                   | 0.10058     |
| Cyclin-dependent kinase 5/CDK5 activator 1 | CDK5R1 CDK5 | Kinase                              | 0.10058     |

### 4. Oxfendazole

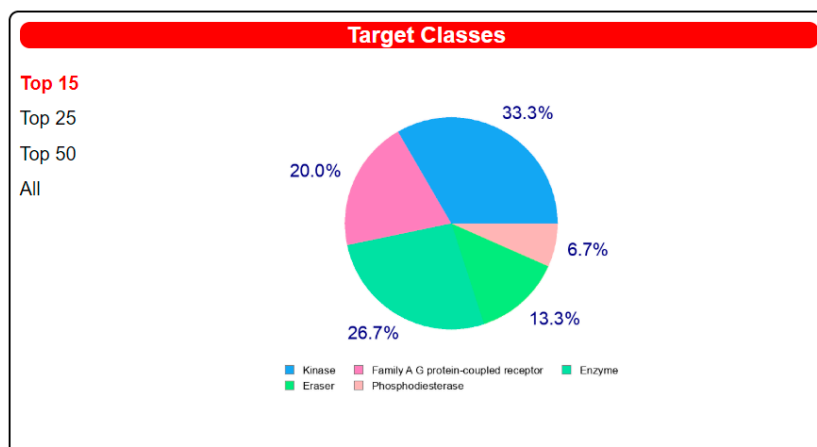

| Target                                 | Common name | Target Class                        | Probability |
|----------------------------------------|-------------|-------------------------------------|-------------|
| Adenosine A2a receptor                 | ADORA2A     | Family A G protein-coupled receptor | 0.41168     |
| MAP kinase p38 alpha                   | MAPK14      | Kinase                              | 0.25369     |
| 11-beta-hydroxysteroid dehydrogenase 1 | HSD11B1     | Enzyme                              | 0.1115      |
| Poly [ADP-ribose] polymerase-1         | PARP1       | Enzyme                              | 0.1115      |
| Cannabinoid receptor 1                 | CNR1        | Family A G                          | 0.1115      |

|  |  |                          |  |
|--|--|--------------------------|--|
|  |  | protein-coupled receptor |  |
|--|--|--------------------------|--|

## 5. Fenbendazole sulfone

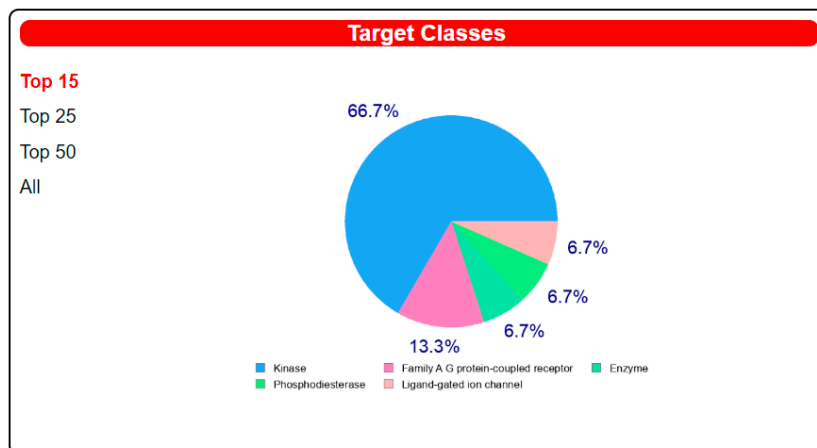

| Target                                                    | Common name | Target Class                        | Probability |
|-----------------------------------------------------------|-------------|-------------------------------------|-------------|
| MAP kinase p38 alpha                                      | MAPK14      | Kinase                              | 0.21825     |
| Adenosine A2a receptor                                    | ADORA2A     | Family A G protein-coupled receptor | 0.10995     |
| 1-acylglycerol-3-phosphate <i>O</i> -acyltransferase beta | AGPAT2      | Enzyme                              | 0.10161     |
| Receptor protein-tyrosine kinase erbB-2                   | ERBB2       | Kinase                              | 0.10161     |
| Epidermal growth factor receptor erbB1                    | EGFR        | Kinase                              | 0.10161     |

## 6. Triclabendazole

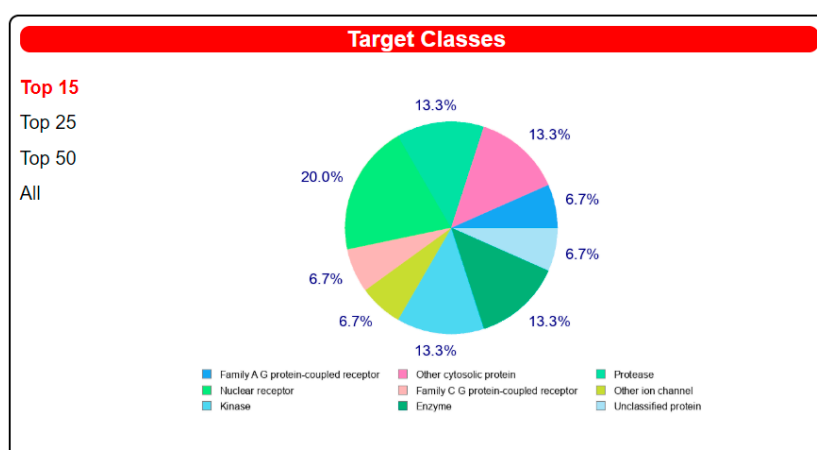

| Target                         | Common name | Target Class                        | Probability |
|--------------------------------|-------------|-------------------------------------|-------------|
| Adenosine A1 receptor          | ADORA1      | Family A G protein-coupled receptor | 0.09787     |
| Heat shock protein HSP 90-beta | HSP90AB1    | Other cytosolic                     | 0.09787     |

|                            |       |                  |         |
|----------------------------|-------|------------------|---------|
|                            |       | protein          |         |
| Cathepsin K                | CTSK  | Protease         | 0.09787 |
| Cathepsin S                | CTSS  | Protease         | 0.09787 |
| Mineralocorticoid receptor | NR3C2 | Nuclear receptor | 0.09787 |

## 7. Triclabendazole sulfone

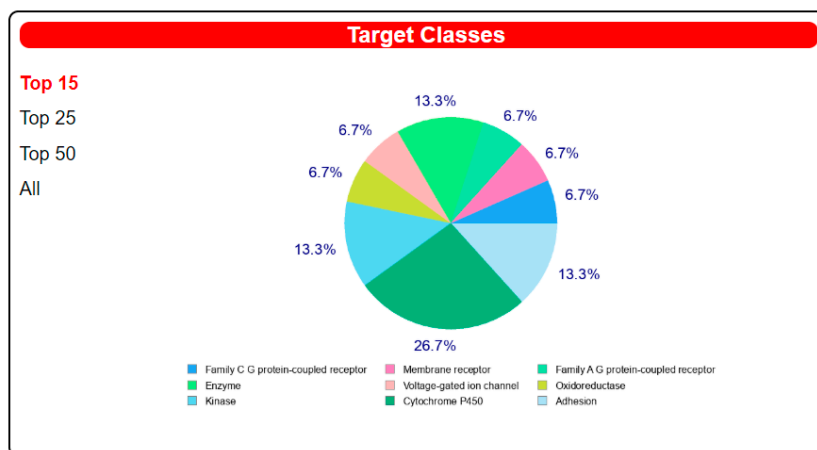

| Target                                                           | Common name | Target Class                        | Probability |
|------------------------------------------------------------------|-------------|-------------------------------------|-------------|
| Metabotropic glutamate receptor 5                                | GRM5        | Family C G protein-coupled receptor | 0.10161     |
| Tumor necrosis factor receptor R1                                | TNFRSF1A    | Membrane receptor                   | 0.10161     |
| Adenosine A3 receptor                                            | ADORA3      | Family A G protein-coupled receptor | 0.10161     |
| 11-beta-hydroxysteroid dehydrogenase 1                           | HSD11B1     | Enzyme                              | 0.10161     |
| Transient receptor potential cation channel subfamily A member 1 | TRPA1       | Voltage-gated ion channel           | 0.10161     |



## 8. Thiabendazole

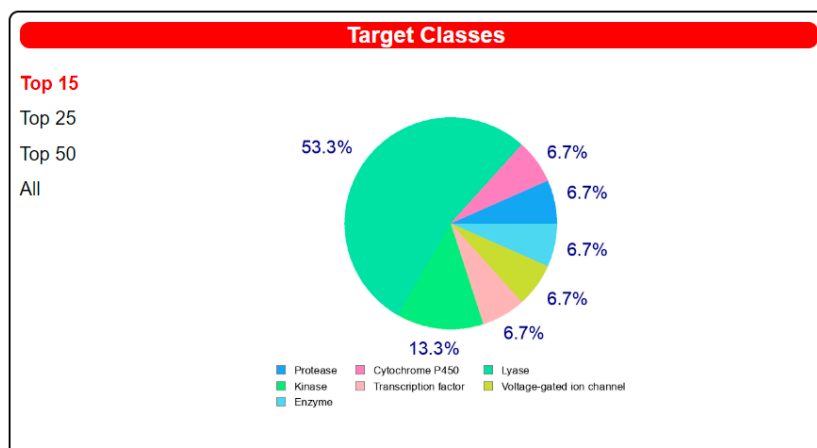

| Target                      | Common name | Target Class    | Probability |
|-----------------------------|-------------|-----------------|-------------|
| Methionine aminopeptidase 1 | METAP1      | Protease        | 0.9888      |
| Cytochrome P450 1A2         | CYP1A2      | Cytochrome P450 | 0.9888      |
| Carbonic anhydrase II       | CA2         | Lyase           | 0.03123     |
| Carbonic anhydrase I        | CA1         | Lyase           | 0.03123     |
| Carbonic anhydrase IX       | CA9         | Lyase           | 0.03123     |

## 9. Flubendazole

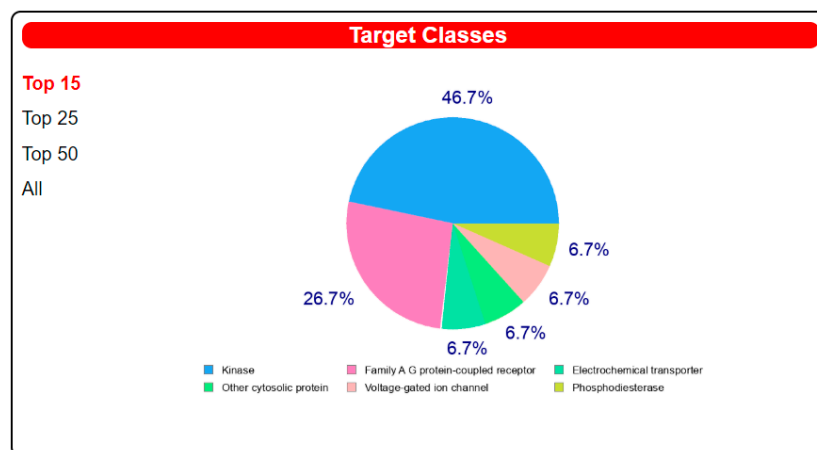

| Target                                        | Common name | Target Class                        | Probability |
|-----------------------------------------------|-------------|-------------------------------------|-------------|
| Tyrosine-protein kinase ABL                   | ABL1        | Kinase                              | 0.50156     |
| Vascular endothelial growth factor receptor 2 | KDR         | Kinase                              | 0.50156     |
| Adenosine A2a receptor                        | ADORA2A     | Family A G protein-coupled receptor | 0.10161     |
| Dopamine transporter                          | SLC6A3      | Electrochemical transporter         | 0.10161     |
| Glycogen synthase kinase-3 beta               | GSK3B       | Kinase                              | 0.10161     |

## 10. Oxibendazole

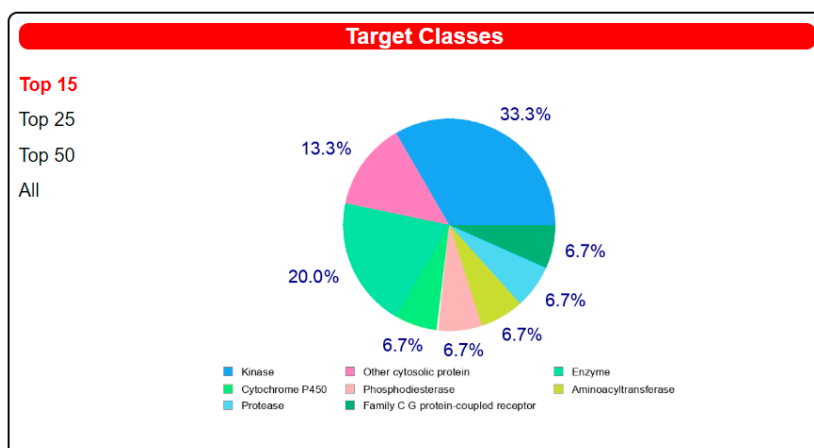

| Target                                        | Common name | Target Class | Probability |
|-----------------------------------------------|-------------|--------------|-------------|
| Vascular endothelial growth factor receptor 2 | KDR         | Kinase       | 0.05356     |
| Tyrosine-protein kinase JAK1                  | JAK1        | Kinase       | 0.05356     |
| Tyrosine-protein kinase JAK2                  | JAK2        | Kinase       | 0.05356     |
| Tyrosine-protein kinase TYK2                  | TYK2        | Kinase       | 0.05356     |
| Tyrosine-protein kinase TIE-2                 | TEK         | Kinase       | 0.05356     |

## 11. Parbendazole

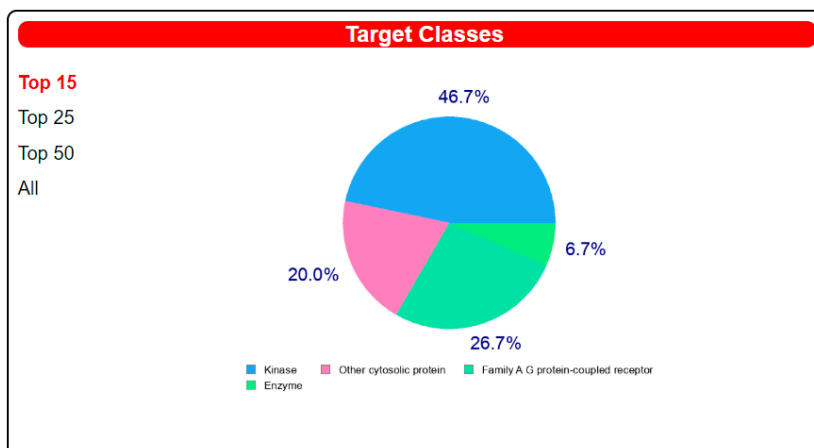

| Target                                        | Common name | Target Class            | Probability |
|-----------------------------------------------|-------------|-------------------------|-------------|
| Tyrosine-protein kinase ABL                   | ABL1        | Kinase                  | 0.08079     |
| Vascular endothelial growth factor receptor 2 | KDR         | Kinase                  | 0.06262     |
| Serine/threonine-protein kinase Aurora-A      | AURKA       | Kinase                  | 0.05356     |
| 5-lipoxygenase activating protein             | ALOX5AP     | Other cytosolic protein | 0.05356     |
| Tyrosine-protein kinase SRC                   | SRC         | Kinase                  | 0.05356     |

**Figure S1.** Representation of the boiled-egg graph calculated by SwissADME web-tool, for the compounds albendazole sulfone, fenbendazole sulfone, thiabendazole, triclabendazole, triclabendazole sulfone, ricobendazole, and oxfendazole.

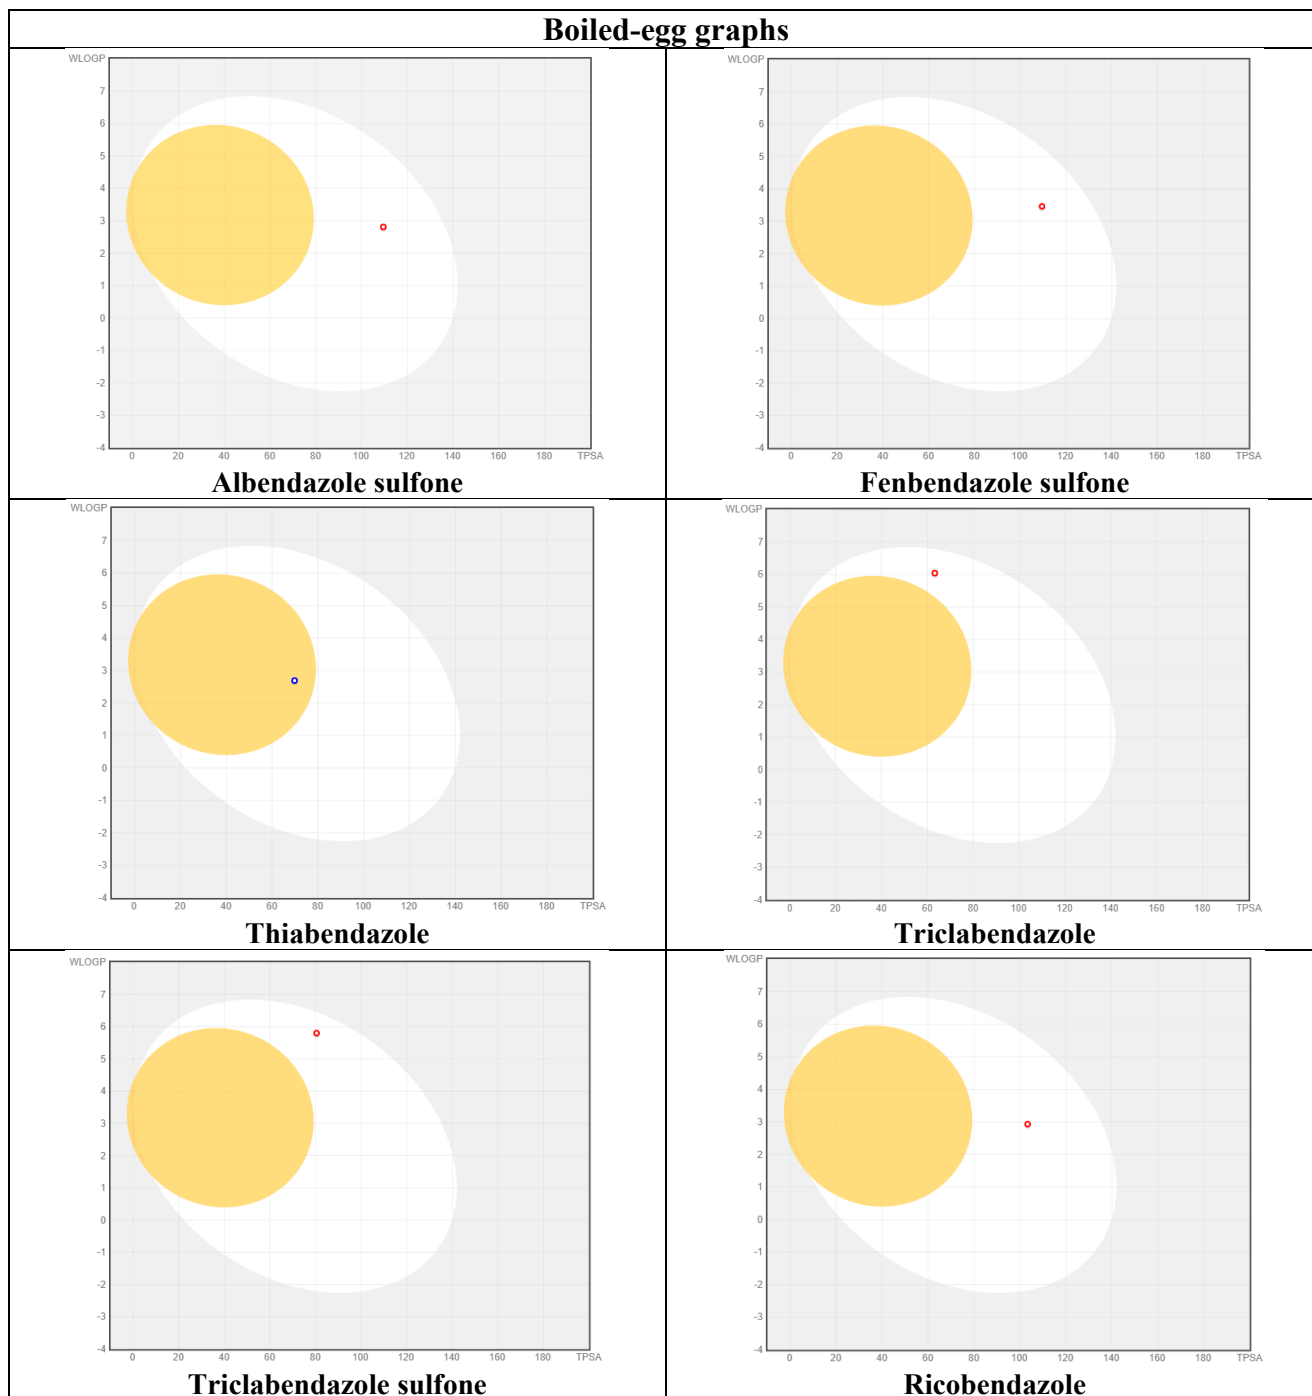

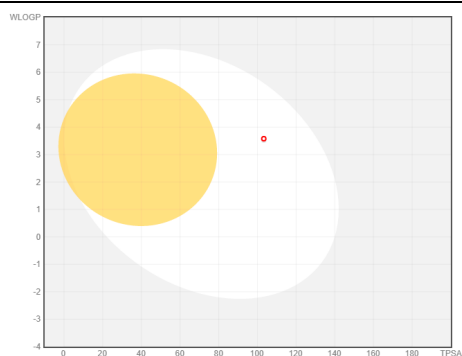

**Oxfendazole**

**White region:** high probability of passive absorption by the gastrointestinal tract.

**Yellow region:** high probability of brain penetration.

● Compounds that are substrates of P-gp

● Compounds that are not substrates of P-gp

**Figure S2.** Representation of the bioavailability-radar computed by SwissADME web-tool, for the compounds albendazole sulfone, fenbendazole sulfone, thiabendazole, triclabendazole, triclabendazole sulfone, ricobendazole, and oxfendazole.

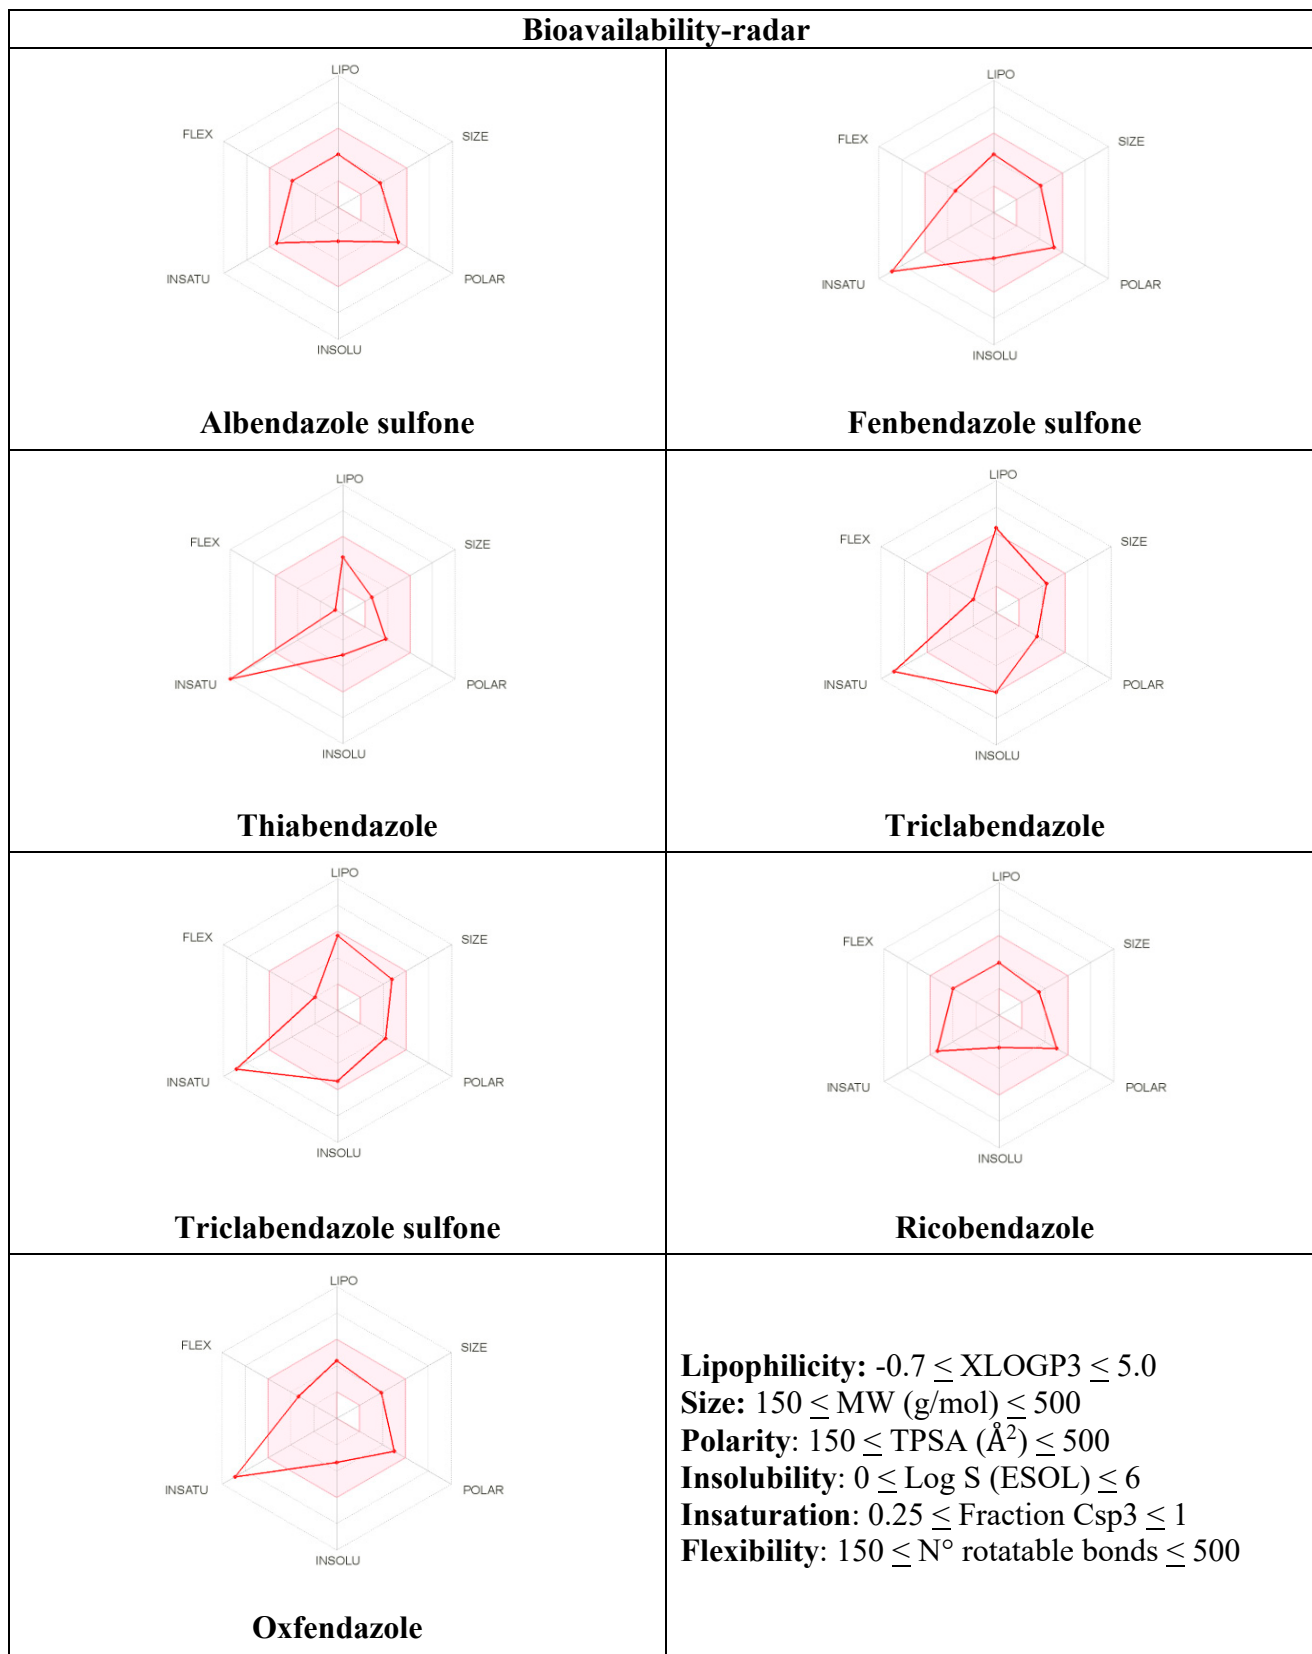

Supplement: s1 [file s1]
